# Supplementary material for: Sequential actions of EOMES and T-BET promote stepwise maturation of natural killer cells
Source: PubMed Central journal article supplement (PMC8440589; doi:10.1038/s41467-021-25758-2), 2021-09-14
Supplement: 41467_2021_25758_MOESM1_ESM.pdf [file 41467_2021_25758_MOESM1_ESM.pdf]

**Supplementary information for**

**Sequential actions of Eomes and T-bet promote stepwise**

**maturation of Natural Killer cells**

Jiang Zhang<sup>1,2</sup>, Stéphanie Le Gras<sup>3,4</sup>, Kevin Pouxvielh<sup>1</sup>, Fabrice Faure<sup>5</sup>, Lucie Fallone<sup>1</sup>,  
Nicolas Kern<sup>1</sup>, Marion Moreews<sup>1</sup>, Anne-Laure Mathieu<sup>1</sup>, Raphaël Schneider<sup>6</sup>, Quentin  
Marliac<sup>1</sup>, Mathieu Jung<sup>3,4</sup>, Aurore Berton<sup>1</sup>, Simon Hayek<sup>7</sup>, Pierre-Olivier Vidalain<sup>1,7</sup>,  
Antoine Marçais<sup>1</sup>, Garvin Dodard<sup>8</sup>, Anne Dejean<sup>9</sup>, Laurent Brossay<sup>8</sup>, Yad Ghavi-Helm<sup>6</sup>,  
and Thierry Walzer<sup>1</sup>

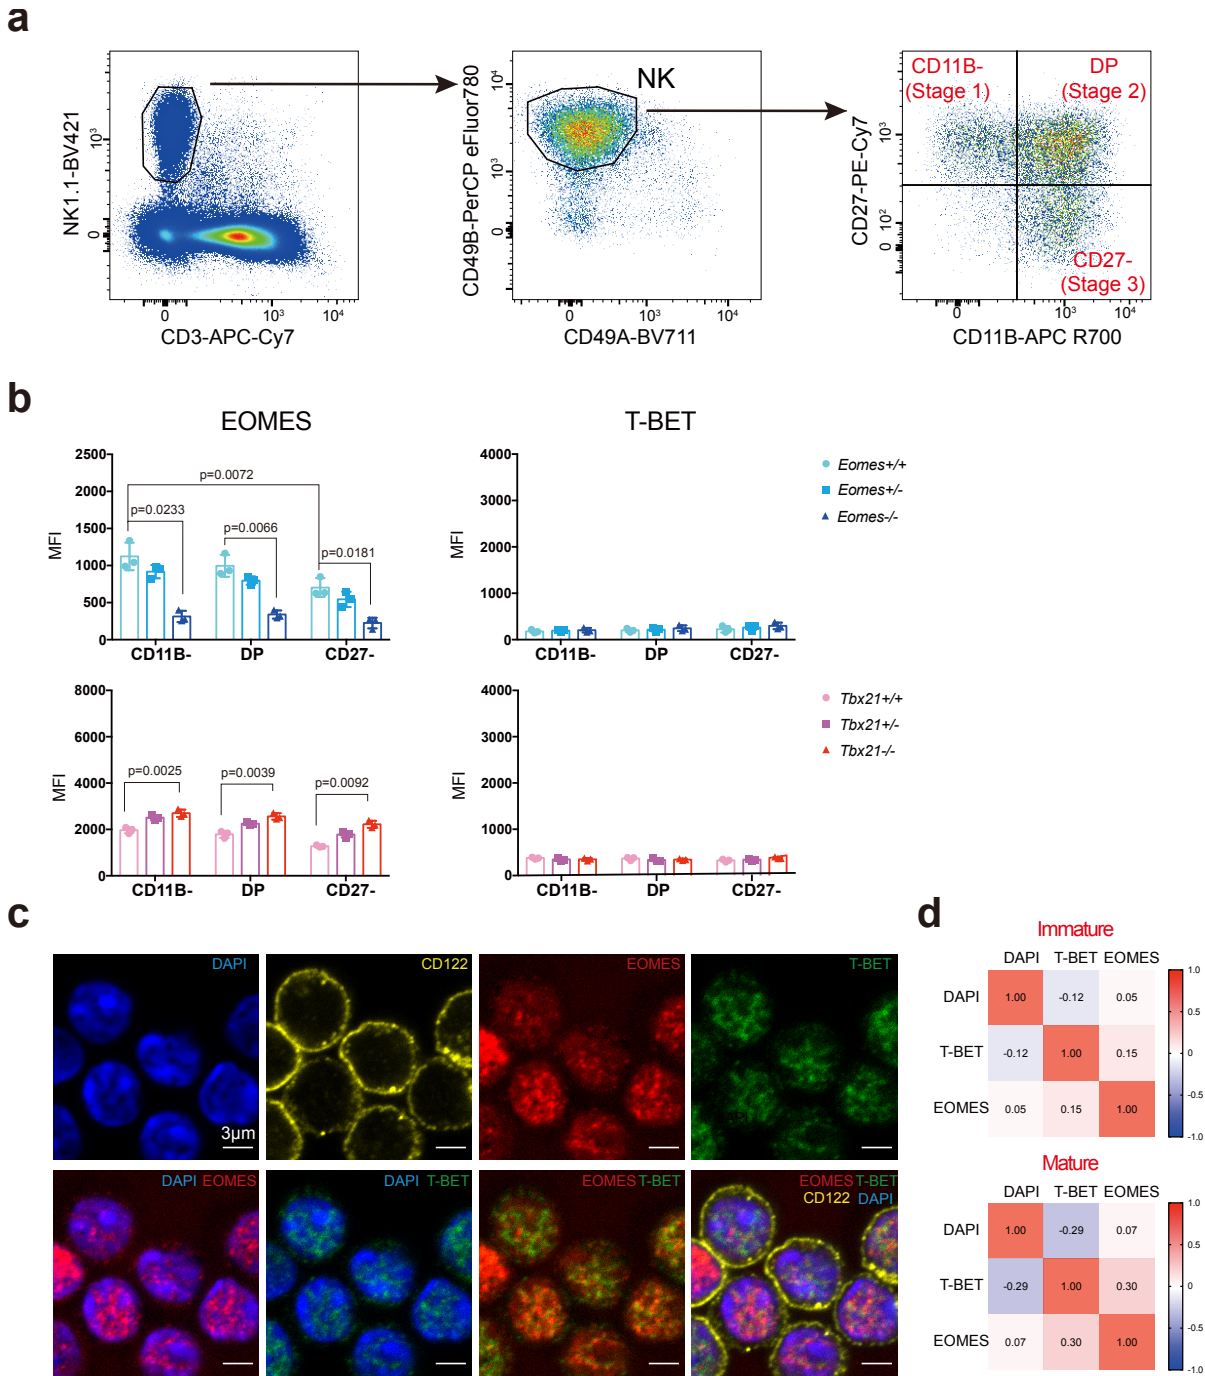

**Supplementary Figure 1.** (a) Gating strategy of NK cells in this study. NK cells were defined as NK1.1 +CD3-CD49B+CD49A-. NK cell subsets CD11B-, DP and CD27- were gated as shown in the right panel. (b) Flow cytometry measurement of T-BET and EOMES in gated NK cells from WT (*Tbx21*<sup>+/+</sup>), *Tbx21*<sup>+/-</sup>, *Tbx21*<sup>-/-</sup>, *Ncr1*<sup>Cre/+</sup> (*Eomes*<sup>+/+</sup>), *Ncr1*<sup>Cre/+</sup> X *Eomes*<sup>lox/lox</sup> (*Eomes*<sup>+/-</sup>) and *Ncr1*<sup>Cre/+</sup> X *Eomes*<sup>lox/lox</sup> (*Eomes*<sup>-/-</sup>) mice, as indicated. Bar graphs show the mean  $\pm$ SD fluorescence intensity (MFI) of EOMES and T-BET staining in gated NK cell subsets from the BM. Data are representative of 3 experiments and 3 mice are shown for each group. (c) Mature NK cells (CD27-) were sorted from WT mice and subsequently stained for nucleus (DAPI), T-BET, EOMES and CD122 for confocal microscopy analysis. Shown are representative images of each staining and combinations for mature NK cells. Images are representative of three individual experiments. (d) Image-J analysis of fluorescence distribution showing the correlation between EOMES, T-BET and DAPI stainings in immature and mature NK cells. Unpaired t-tests (two-tailed) were used for statistical analysis of data presented in this figure.

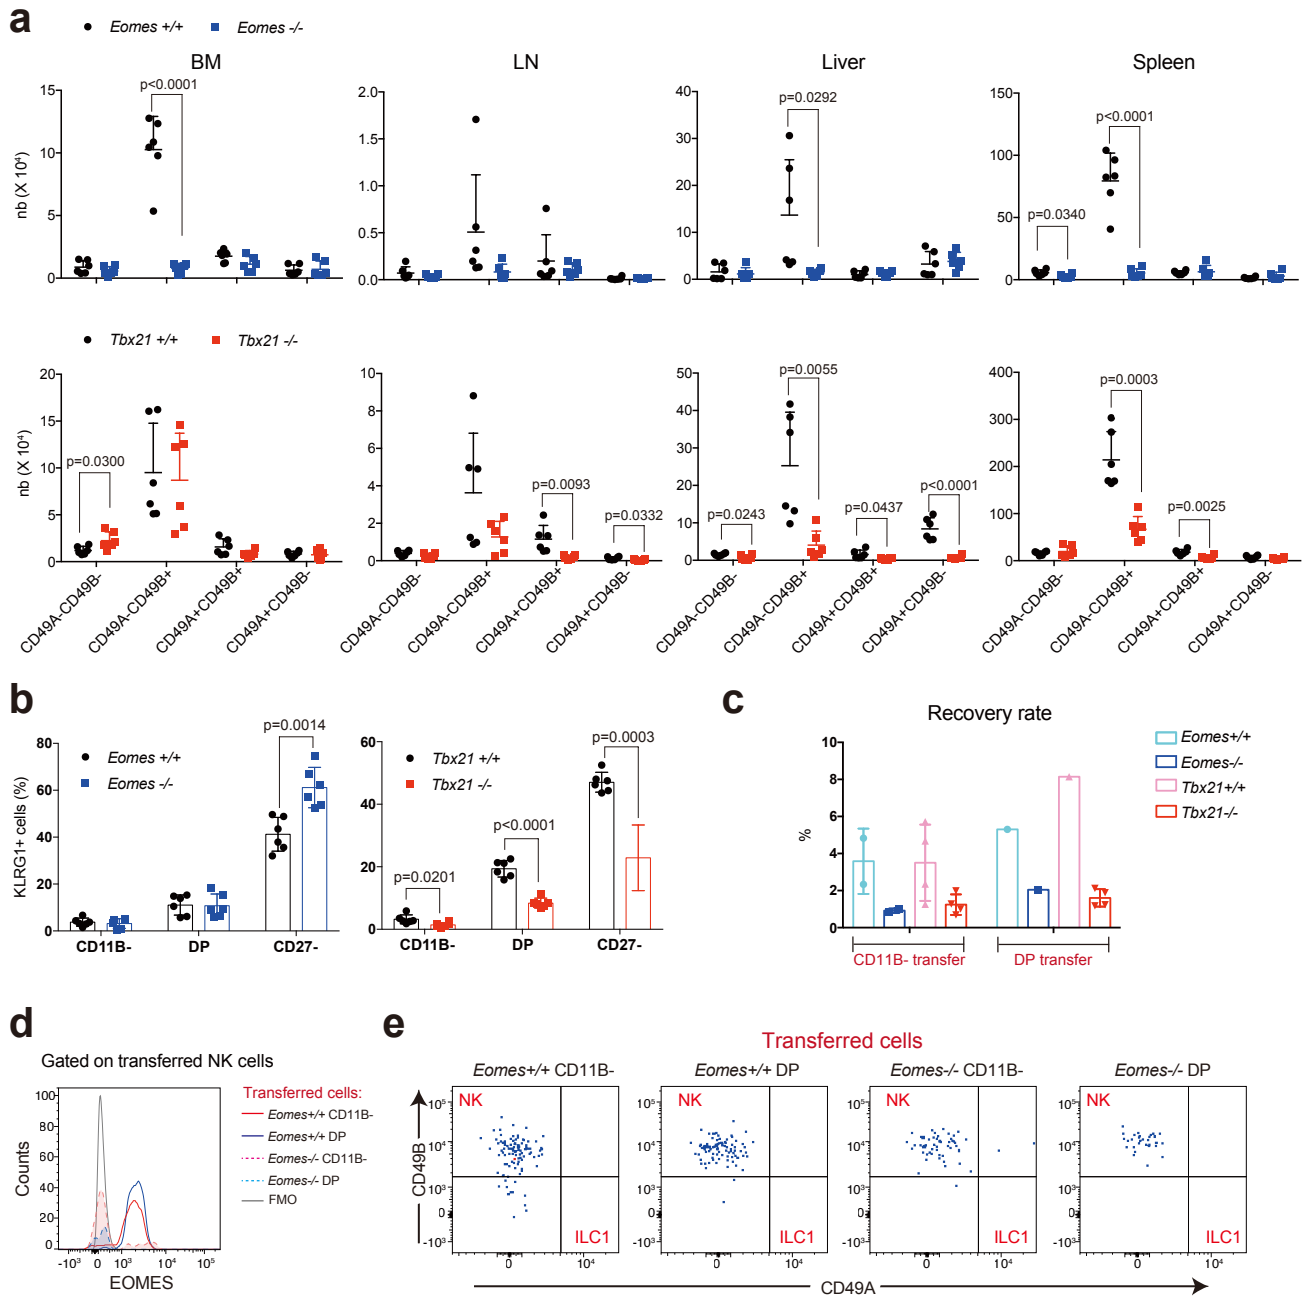

**Supplementary Figure 2.** (a) Number of NK1.1+CD3- ILCs of the CD49A<sup>+</sup> CD49B<sup>-</sup>, CD49A<sup>+</sup>CD49B<sup>+</sup>, CD49A<sup>-</sup>CD49B<sup>+</sup> and CD49A<sup>-</sup>CD49B<sup>-</sup> phenotype in the indicated organs of WT, *NK-Eomes*<sup>-/-</sup> and *Tbx21*<sup>-/-</sup> mice. (b) FACS measurement of KLRG1 expression in gated spleen NK cells from mice of the indicated genotype. Bar graphs show the mean +/-SD and dots corresponding to individual mice. Data are pooled from 2 experiments with n=4-6 mice in total. (c-e) Relative to Figure 2d: (c) Recovery rate of transferred NK cells of the indicated genotype in the spleen of recipient mice. Bar graphs show the mean +/-SD. Data are from 1-4 mice representative of two experiments. (d-e) Flow cytometry analysis of EOMES (d) and CD49A/CD49B (e) expression in recovered NK cells of different genotypes, as indicated. Unpaired t-tests (two-tailed) were used for statistical analysis of data presented in this figure.

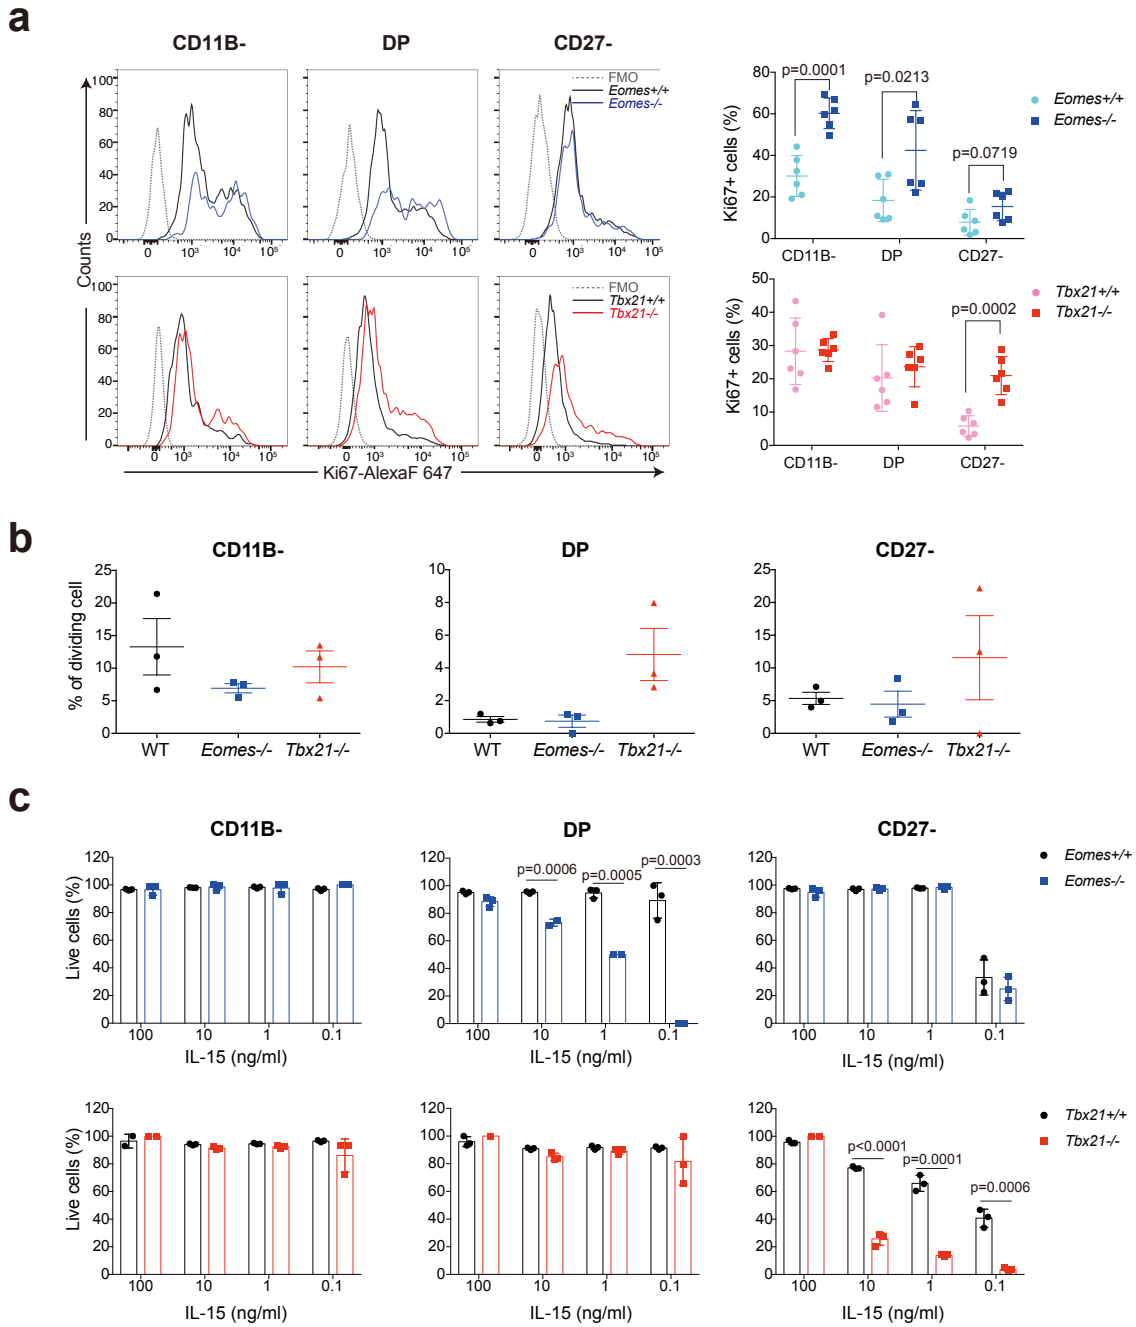

**Supplementary Figure 3. Analysis of *Tbx21*<sup>-/-</sup> and *Eomes*<sup>-/-</sup> NK cell proliferation. (a)** Flow cytometry analysis of Ki67 expression in spleen NK cells. Each dot corresponds to a single mouse (n=6, pooled from 2 experiments), and graphs show the mean percentage  $\pm$  SD. Representative FACS histograms are also shown. **(b)** Adoptive transfer experiment of CTV-labeled WT and *Tbx21*<sup>-/-</sup> or WT and *Eomes*<sup>-/-</sup> NK cells in Ly5a mice. Graphs show the mean percentage  $\pm$  SD of NK cells of each subset and of each genotype that underwent division two weeks after transfer, as determined by flow cytometry measurement of CTV dilution. (n=2 experiments, 3 mice each). **(c)** Analysis of subset viability after culturing with IL-15 for 48h at the indicated concentrations. Data are representative of 2 independent experiments. Unpaired t-tests (two-tailed) were used for statistical analysis of data presented in this figure.

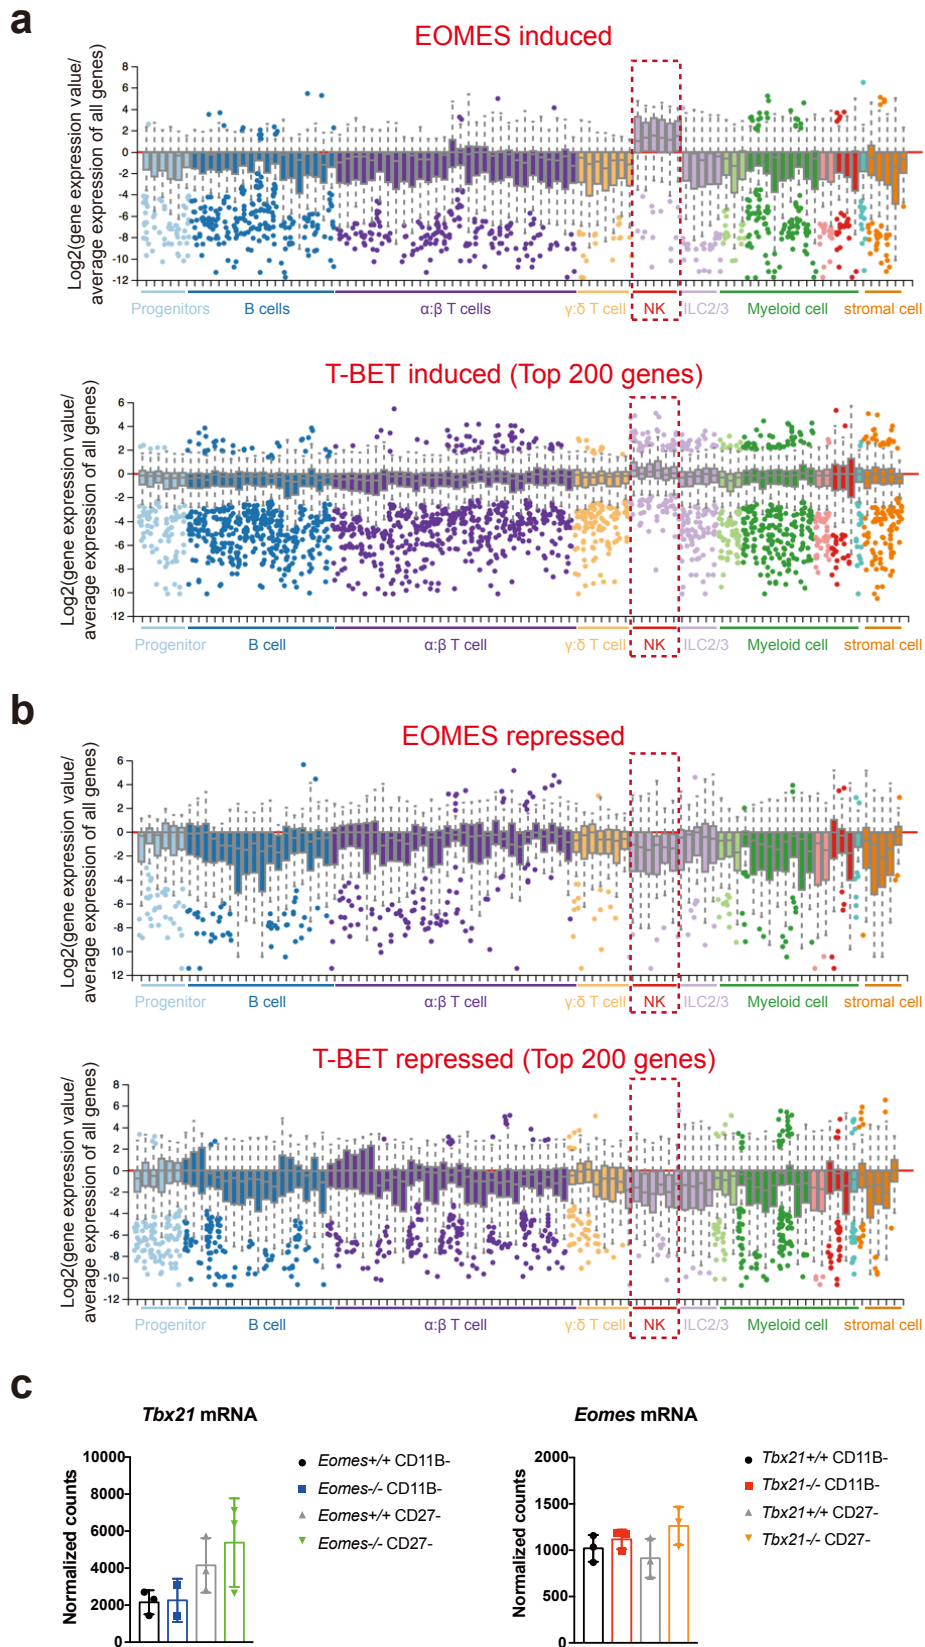

**Supplementary Figure 4. Expression pattern of NK cell genes regulated by T-BET or EOMES across the immune system. (a)** Expression profiles of NK cell genes activated by T-BET or EOMES across immune subsets (Immgen data<sup>38</sup>). **(b)** Expression profiles of NK cell genes repressed by T-BET or EOMES across immune subsets (Immgen data<sup>38</sup>). **(c)** Normalized read counts for T-BET or EOMES mRNA. Bar graphs show the mean  $\pm$  SD count extracted from RNA-seq experiment described in Figure 4. N=3 mice.

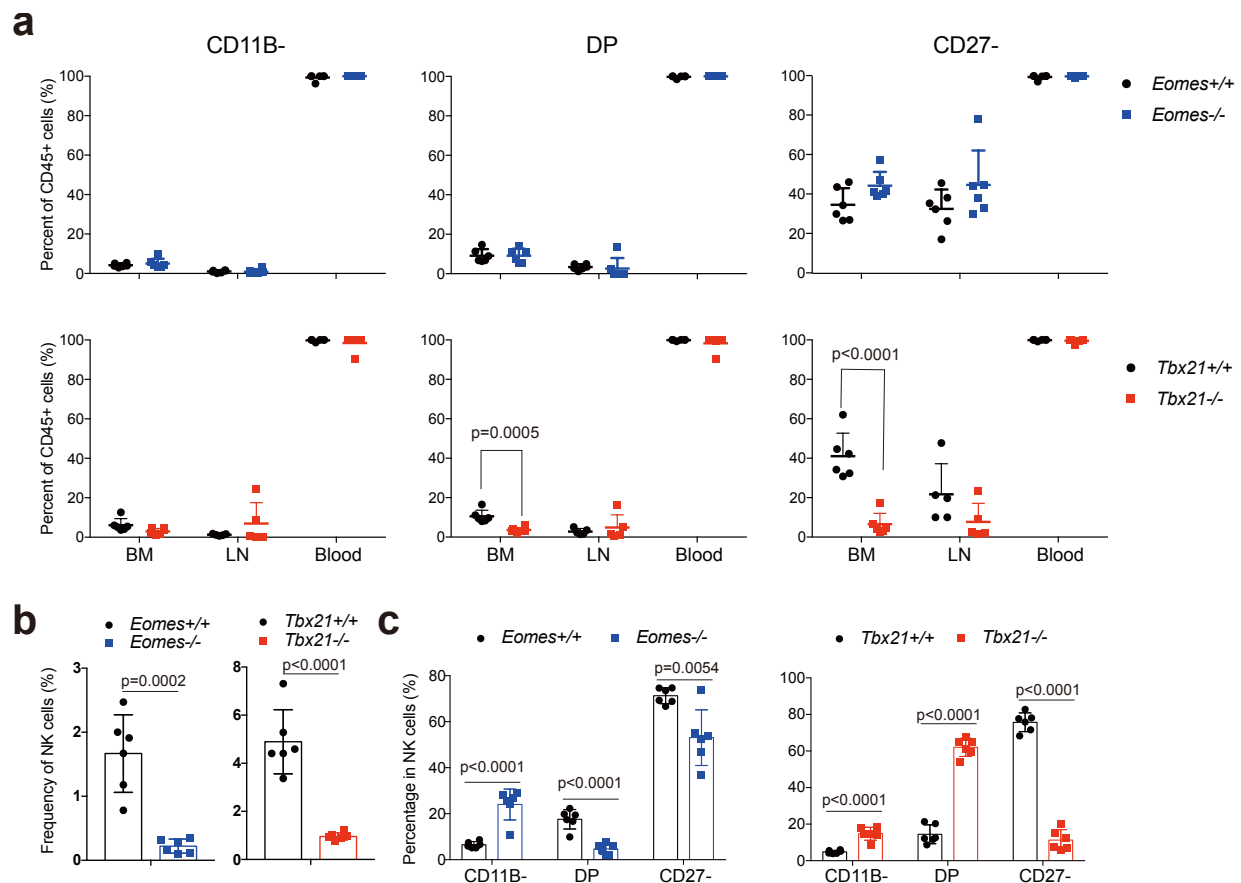

**Supplementary Figure 5. T-BET promotes NK cell blood circulation.** (a) Mice of the indicated genotypes were injected with CD45 MAb intravenously 5 minutes before sacrifice. Graphs show the mean  $\pm$ SD percentage of CD45+ NK cells among different subsets of different organs as determined by flow cytometry. Results were pooled from two experiments with  $n=5-6$  mice in total. (b-c) Graphs show the mean  $\pm$ SD frequency of blood (b) NK cells and (c) NK cell subsets in the indicated genotype ( $n=6$  pooled from two experiments). Unpaired t-tests (two-tailed) were used for statistical analysis of data presented in this figure.

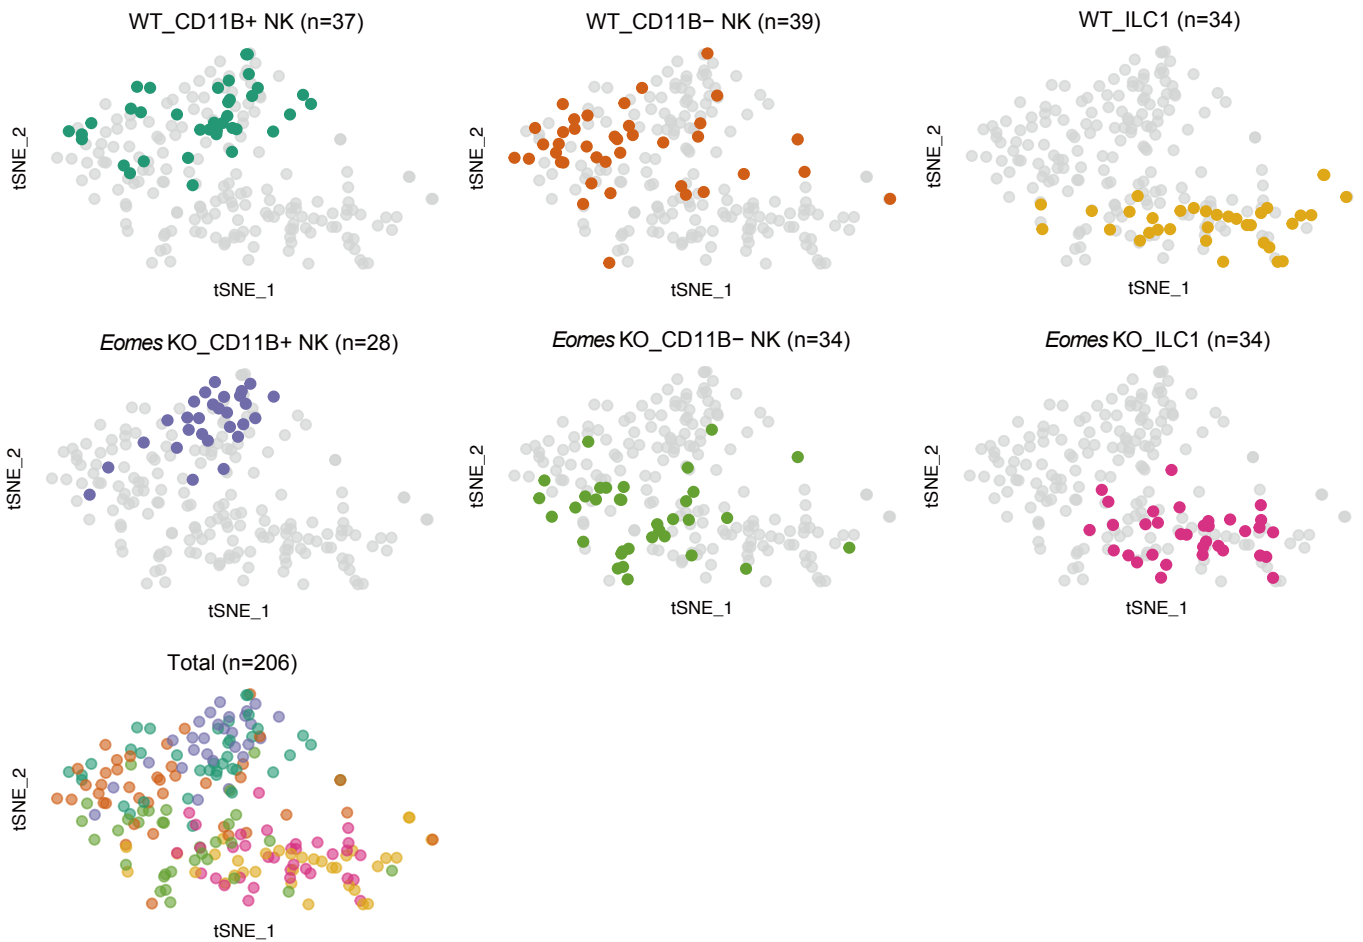

**Supplementary Figure 6. scRNAseq analysis of WT and *Eomes*<sup>-/-</sup> NK cells and ILC1s.** tSNE visualization of 300 single cell transcriptomes for the indicated sorted cell types. This figure shows the distribution of the samples based on the expression of the most variable genes in the dataset.

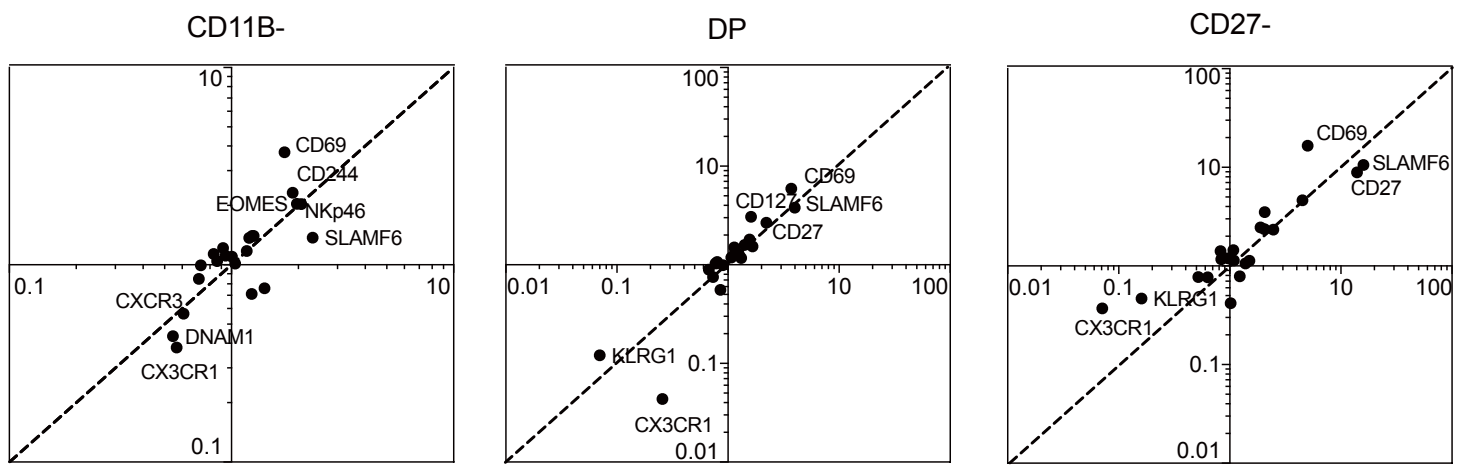

**Supplementary Figure 7. The role of T-BET in NK cell differentiation is mostly cell-intrinsic.** Sublethally irradiated mice Ly5a were reconstituted with a 1:1 mix of BM from Ly5a and *Tbx21*<sup>-/-</sup> mice to generate BM chimeric mice. 8 weeks later, spleen NK cells from these mice and from individual Ly5a and *Tbx21*<sup>-/-</sup> mice were analyzed by flow cytometry for a series of 23 parameters (DNAM1, NK1.1, CD27, CD11b, CD69, CXCR3, CD122, KLRG1, SLAMF6, CD127CD49b, CD160, NKp46, CX3CR1, Ki67, TCF7, EOMES, T-BET, CD244, CD11A, CRACC, GZMA, GZMB). Results show the mean expression ratio between KO and control NK cells for each marker and plotted as the ratio found in BM chimera mice as a function of that in individual mice. N=6 mice in each group. Unpaired t-tests (two-tailed) were used for statistical analysis of data presented in this figure.



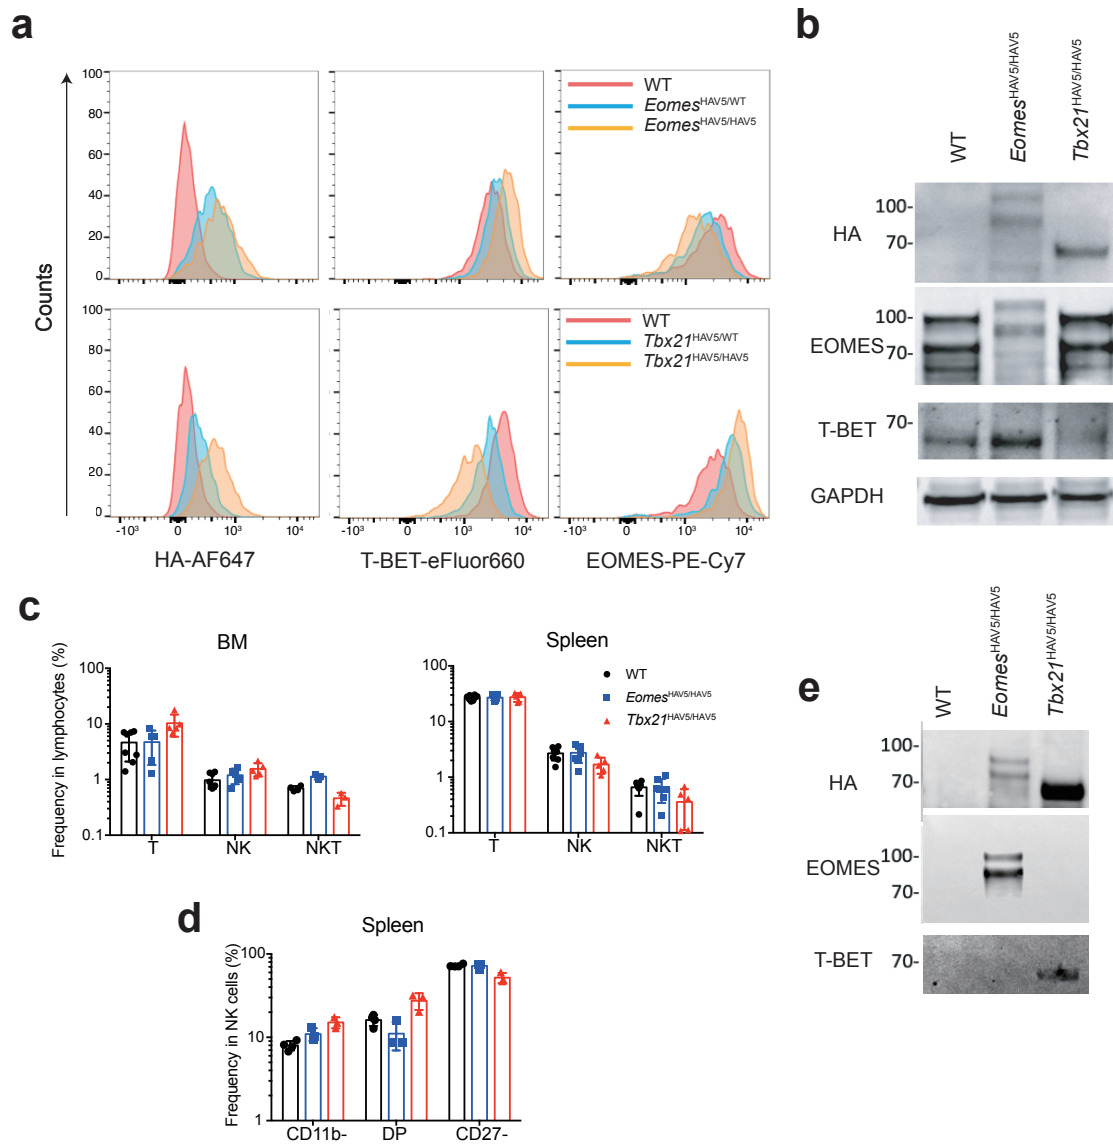

**Supplementary Figure 8. Validation of HA-V5 expression in knock-in mice. (a)** Flow cytometry analysis of T-BET, EOMES, and HA expression in gated NK cells from the indicated mouse strains. **(b)** WB analysis of HA, T-BET and EOMES expression in NK cells enriched from the spleen of the indicated mouse strains. **(c-d)** Flow cytometry analysis of NK cell frequency (mean $\pm$ SD) in the indicated organs **(c)** and spleen NK cell maturation **(d)** in WT, *Tbx21-HAV5* and *Eomes-HAV5* mice. N=5-7 mice in each group pooled from two experiments. **(e)** Spleen cells from WT, *Eomes-HAV5* and *Tbx21-HAV5* were lysed and the lysate was subjected to anti-HA IP. The immunoprecipitate was then western blotted with anti-HA, anti-EOMES and anti-T-BET antibodies. Data are representative of two experiments. Unpaired t-tests (two-tailed) were used for statistical analysis of data presented in this figure.

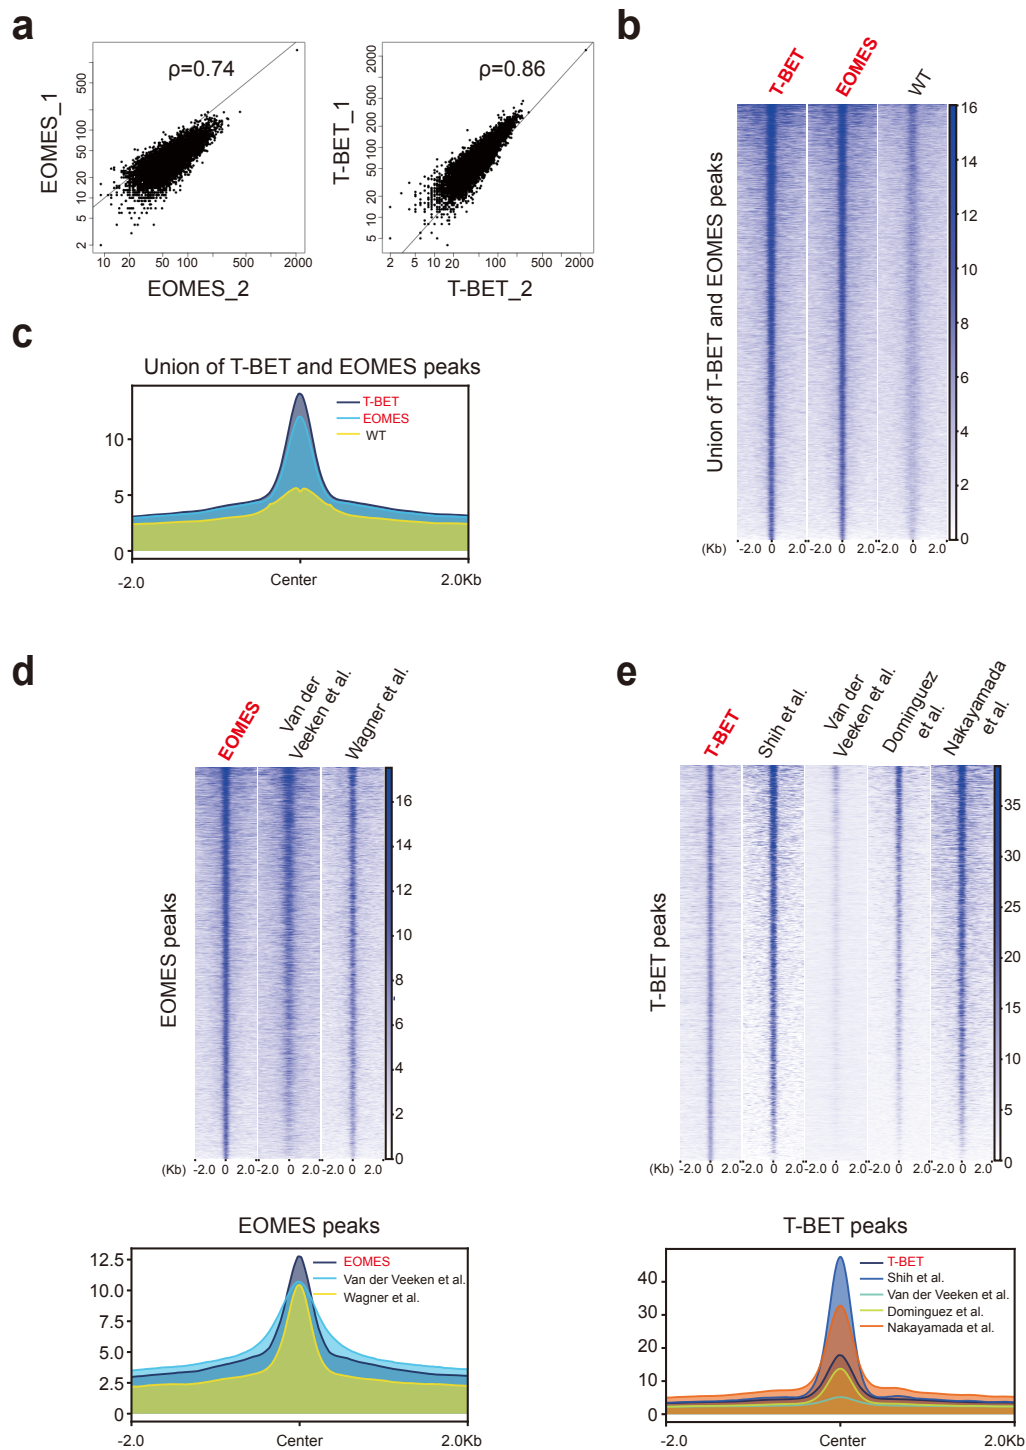

**Supplementary Figure 9. Quality controls of EOMES and T-BET ChIP-seq experiments.** (a) Scatter plot showing the number of reads in detected peaks in both replicates of EOMES and T-BET ChIP-seq experiments. The Spearman correlation coefficient is shown. (b) Heatmap showing EOMES and T-BET ChIP-seq data compared to controls in WT NK cells at the union of EOMES and T-BET peaks. Regions shown are centered at the middle of the peak and extended by +/- 2Kb. Data are the pool of both replicates for each condition. (c) Mean profile plots at the union of EOMES and T-BET ChIP-seq peaks +/-2Kb around the center of the regions. The control condition is also shown. (d-e) Heatmaps and mean profile plots showing read density at positions of EOMES (d) and T-BET (e) peaks as defined in our study, for different ChIP-seq experiments as follows: anti-EOMES: Van Der Veecken<sup>59</sup>, Wagner<sup>32</sup>; anti-T-BET: Shih<sup>15</sup>, Dominguez<sup>61</sup>, Van Der Veecken<sup>59</sup>, Nakayamada<sup>62</sup>.

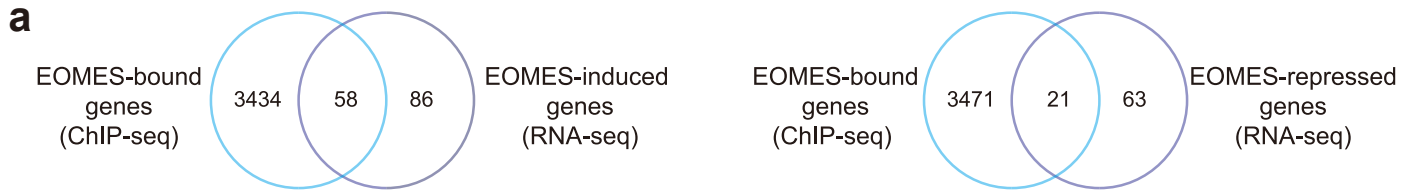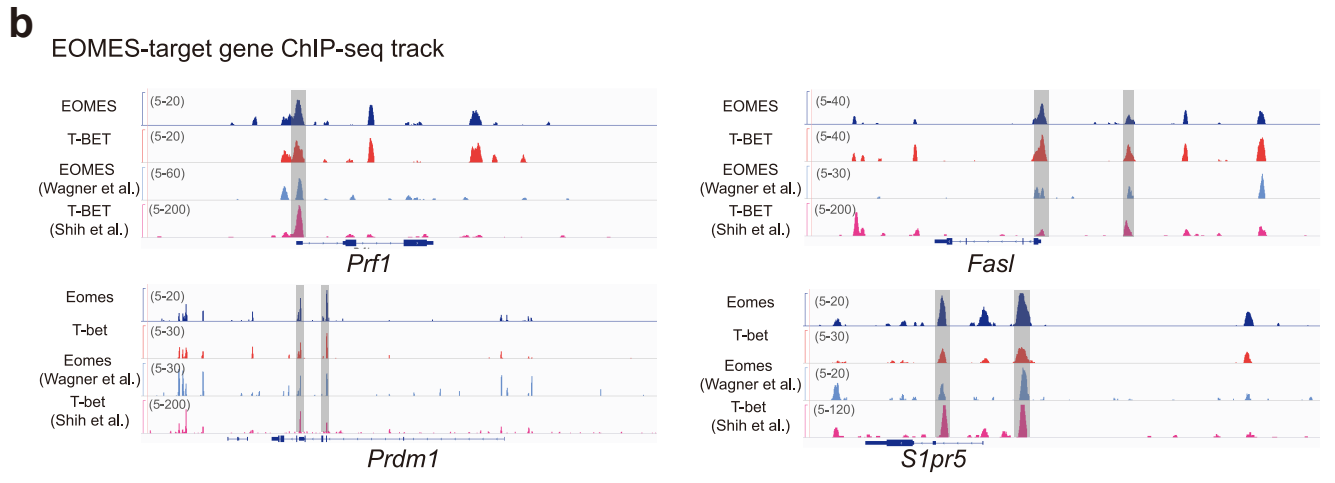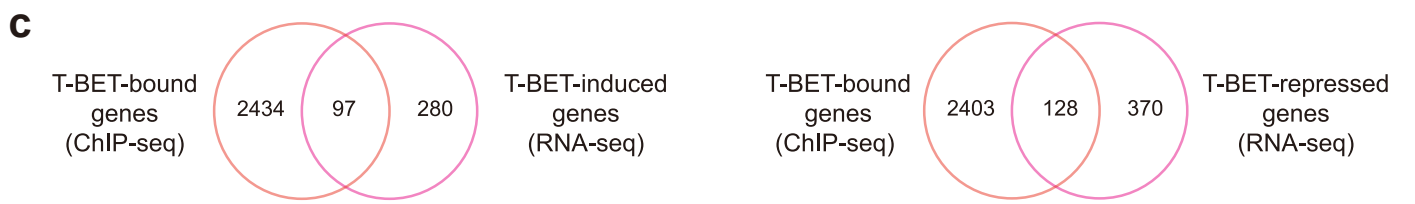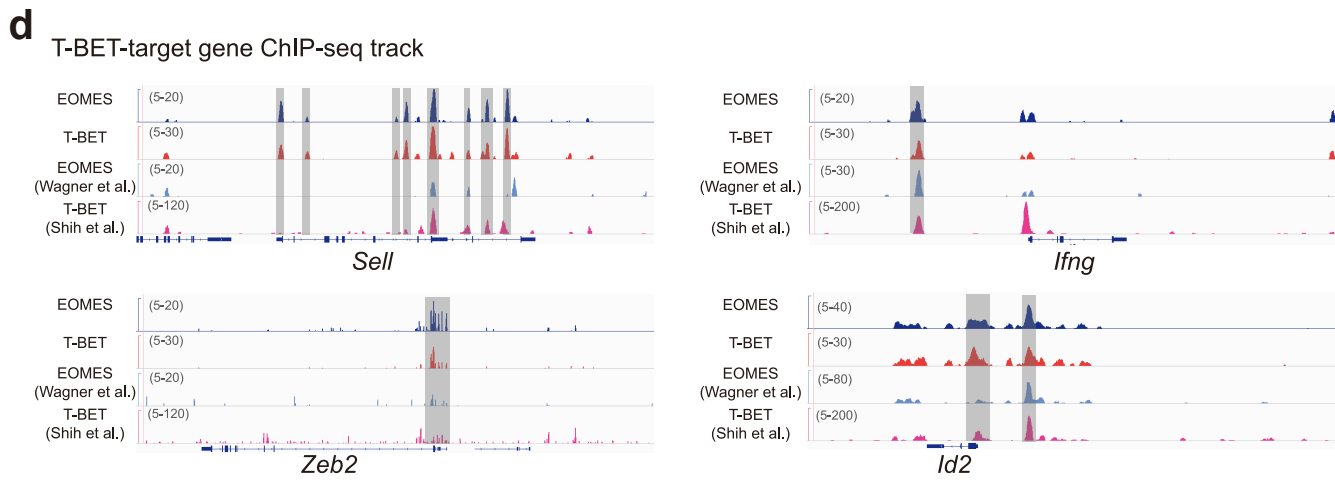

**Supplementary Figure 10 related to Figure 8. EOMES and T-BET target genes.** (a) Venn diagrams showing the overlap between EOMES-bound (ChIP-seq) and EOMES-induced or repressed genes (RNA-seq). (b) Examples of ChIP-seq tracks for selected EOMES target genes. (c) Venn diagrams showing the overlap between T-BET-bound (ChIP-seq) and T-BET-induced or repressed genes (RNA-seq). (d) Examples of ChIP-seq tracks for selected T-BET target genes. For (a) and (c) panels, p-values were calculated using the hypergeometric test and were  $p=2.930306e-38$  and  $p=1.593572e-07$  respectively.

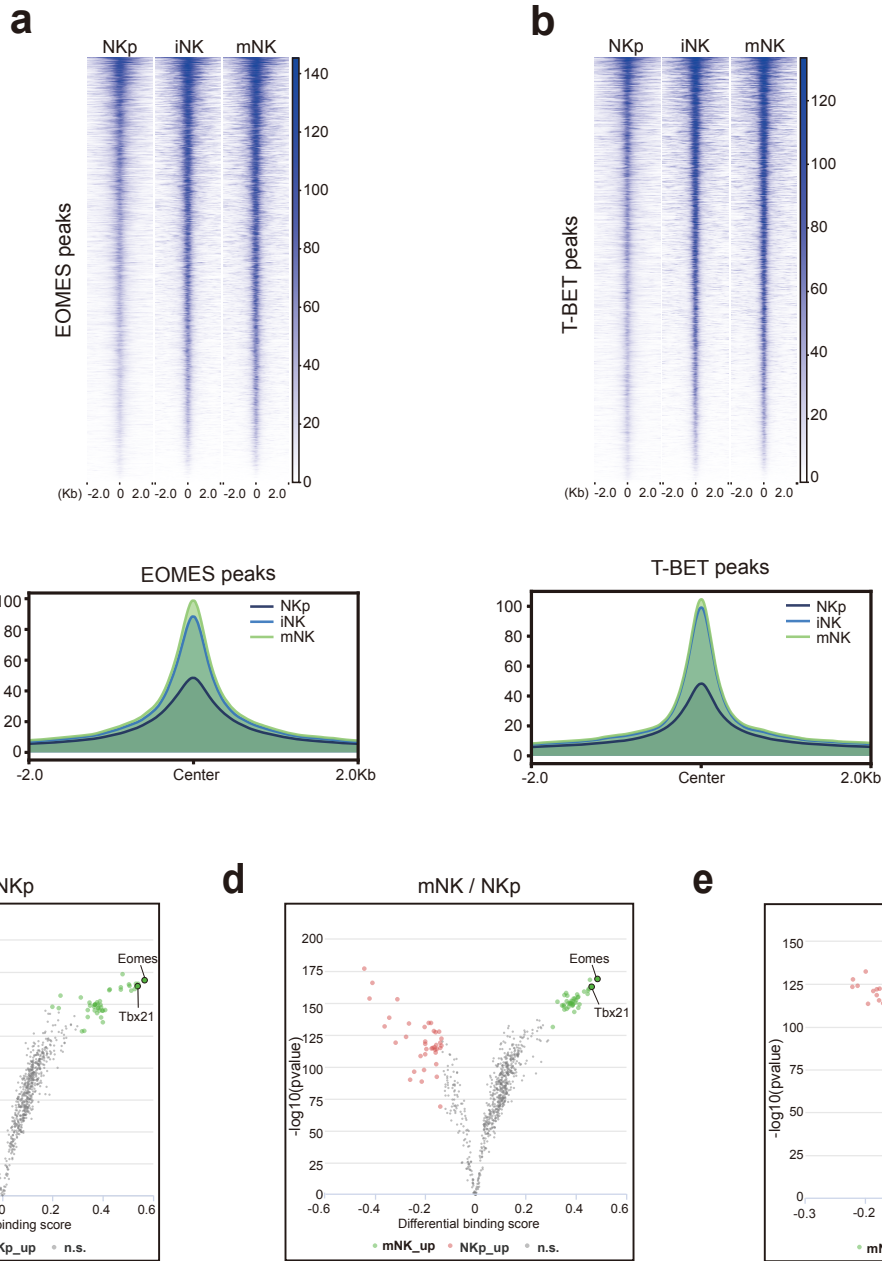

**Supplementary Figure 11. T-BET/EOMES binding is associated with epigenetic changes during NK cell differentiation.** (a-b) Heatmaps and mean profile plots of ATAC-seq regions for the indicated samples at EOMES (a) and T-BET (b) ChIP-seq peak positions. (c-e) Volcano plots showing differential TF binding sites as predicted by TOBIAS analysis of footprints in ATAC-seq data of NKp, iNK and mNK from Shin et al<sup>15</sup>. (c) NKp vs iNK; (d) NKp vs mNK; (e) iNK vs mNK.

### Supplementary Table 1: Antibody list

| For Flow Cytometry Antibodies:      | Clone       | Manufacturer     | Catalogue        | Dilution |
|-------------------------------------|-------------|------------------|------------------|----------|
| Anti-mouse CD3e-FITC                | 145-2C11    | Biolegend        | Cat# 100306,     | 1/200    |
| Anti-mouse CD3e-PE                  | 145-2C11    | eBiosciences,    | Cat# 12-0031     | 1/400    |
| Anti-mouse CD3-APC-Cy7              | 17A2        | Biolegend        | Cat# 100222      | 1/100    |
| Anti-mouse CD3-AlexaF 700           | 17A2        | Biolegend        | Cat# 100216      | 1/100    |
| Anti-mouse CD3-PerCP-eFluo710       | 17A2        | eBiosciences     | Cat# 46-0032-80  | 1/400    |
| Anti-mouse CD11b-APC-R700           | M1/70       | Biolegend        | Cat# 124216      | 1/800    |
| Anti-mouse CD11b-APC-Cy7            | M1/70       | BD Biosciences   | Cat# 557657      | 1/200    |
| Anti-mouse CD11b-PE-Dazzle 594      | M1/70       | Biolegend        | Cat# 101255      | 1/800    |
| Anti-mouse CD19-APC-eF780           | 1D3         | eBiosciences     | Cat# 47-0193     | 1/200    |
| Anti-mouse CD19-FITC                | 1D3         | BD Biosciences   | Cat# 553785      | 1/200    |
| Anti-mouse CD27-PE                  | LG.7F9      | eBiosciences     | Cat# 12-0271-82  | 1/400    |
| Anti-mouse CD27-PE-Cy7              | LG.3A10     | Biolegend        | Cat# 124216      | 1/800    |
| Anti-mouse CD27-BUV737              | LG.3A10     | BD Biosciences   | Cat# 565307      | 1/100    |
| Anti-mouse CD45-PE                  | 30-F11      | BD Biosciences   | Cat# 553081      | 1/200    |
| Anti-mouse CD45.1- BUV737           | A20         | BD Biosciences   | Cat# 564574      | 1/200    |
| Anti-mouse CD45.2-FITC              | 104         | eBiosciences     | Cat# 11-0454     | 1/400    |
| Anti-mouse CD45.2-BV650             | 104         | Biolegend        | Cat# 109836      | 1/200    |
| Anti-Mouse CD45.2-BV786             | 104         | BD Biosciences   | Cat# 563686      | 1/100    |
| Anti-mouse CD49a-PE                 | Ha31/8      | BD Biosciences   | Cat# 562115      | 1/400    |
| Anti-mouse CD49a- BV711             | Ha31/8      | BD Biosciences   | Cat# 5648631     | 1/100    |
| Anti-mouse CD49b-PerCP-eFluor710    | DX5         | eBiosciences     | Cat# 46-5971     | 1/200    |
| Anti-mouse CD49b-BV421              | DX5         | BD Biosciences   | Cat# 563063      | 1/100    |
| Anti-Mouse CD62L-PE Cy7             | Mel14       | eBiosciences     | Cat# 25-0621-81  | 1/200    |
| Anti-Mouse CD69-PE Cy7              | H1.2F3      | BD Biosciences   | Cat# 561930      | 1/100    |
| Anti-Mouse CD122-APC                | TM-b1       | Biolegend        | Cat# 123214      | 1/200    |
| Anti-Mouse CD127-APC eFluor780      | A7R34       | eBiosciences     | Cat# 47-1271,    | 1/200    |
| Anti-Mouse CD226-APC                | 10E5        | eBiosciences     | Cat# 17-2261-82  | 1/200    |
| Anti-Mouse CD244.2 (2B4)-AlexaF 647 | m2B4 (B6)45 | Biolegend        | Cat# 133510      | 1/200    |
| Anti-Mouse Eomes-PE-Cy7             | Dan11mag    | eBiosciences     | Cat# 25-4875-80  | 1/100    |
| Anti-Mouse Gzma-PE-Cy7              | 3G8.5       | eBiosciences     | Cat# 25-5831-82  | 1/200    |
| Anti-Mouse IFN $\gamma$ -PE-Cy7     | Dan11mag    | eBiosciences     | Cat# 25-4875-80  | 1/200    |
| Anti-Mouse Ki67-AlexaF 647          | SolA15      | eBiosciences     | Cat# 51-5698     | 1/100    |
| Anti-Mouse KLRG1-BUV395             | 2F1         | BD Biosciences   | Cat# 740279      | 1/100    |
| Anti-Mouse Ly49A-FITC               | YE1/48.10.6 | Biolegend        | Cat# 116805,     | 1/200    |
| Anti-Mouse Ly49D-VioGreen           | 4 E5        | Miltenyi         | Cat# 130-102-206 | 1/100    |
| Anti-Mouse Ly49G2-BUV395            | 4D11        | BD Biosciences   | Cat# 742885      | 1/200    |
| Anti-mouse NK1.1-APC                | PK136       | BD Biosciences   | Cat# 550627      | 1/400    |
| Anti-mouse NK1.1-BV421              | PK136       | Biolegend        | Cat# 108732      | 1/400    |
| Anti-mouse Nkp46-AlexaF 647         | 29A1.4      | BD Biosciences   | Cat# 560755      | 1/100    |
| Anti-mouse Nkp46-V450               | 29A1.4      | BD Biosciences   | Cat# 560764      | 1/100    |
| Anti-Mouse phospho-STAT4            | 38/p-Stat4  | BD Biosciences   | Cat# 558249      | 1/40     |
| Anti-Mouse T-bet-FITC               | 4B10        | Biolegend        | Cat# 644812      | 1/50     |
| Anti-Mouse T-bet-PE-Cy7             | 4B10        | eBiosciences     | Cat# 25-5825-80  | 1/200    |
| Anti-Mouse T-bet-eFluor 660         | 4B10        | eBiosciences     | Cat# 50-5825     | 1/100    |
| Anti-HA-Tag-AF647                   | 6E2         | Cell Signaling T | Cat# 3444        | 1/200    |

| For Western Blot Antibodies: |            |                  |              |        |
|------------------------------|------------|------------------|--------------|--------|
| Anti-Mouse GAPDH             | 14C10      | Cell Signaling T | Cat# 2118L   | 1/1000 |
| Anti-Mouse T-bet             | 4B10       | Biolegend        | Cat# 644801  | 1/200  |
| Anti-Mouse Eomes             | polyclonal | Abcam            | Cat# ab23345 | 1/100  |
| Anti-HA-Tag                  | C29F4      | Cell Signaling T | Cat #3724    | 1/1000 |

### Supplementary Table 2: Primer list

| Primer name | sequence                  |
|-------------|---------------------------|
| Ex6-F1      | GCGAAGGAGACTAAGAGGAGGAG   |
| Ex6-R1      | (AGCACCAGGTTCTGACTGTAGTTC |
| Ex6-F2      | GCGAAGGAGACTAAGAGGAGGAG   |
| Ex6-R2      | AGCACCAGGTTCTGACTGTAGTTC  |

## Supplementary Methods

### Analysis of public data

*ChIP-seq datasets.* The following published datasets were downloaded from GEO or SRA in SRA format and converted to FASTQ format using the fastq-dump program in the sratoolkit (version 2.1.9).

| Sample name                        | GEO/SRA accession | Publication           |
|------------------------------------|-------------------|-----------------------|
| 87_T-bet_Sp_NK                     | GSM2056378        | Shih et al.           |
| Tbet_WT_Th1                        | GSM836124         | Nakayamada et al.     |
| CD8_TBET_WT.1                      | SRX1070596        | Dominguez et al       |
| Eomes_ChIPseq_rep1                 | GSM3900380        | Wagner et al.         |
| b6_cast_lcmv_cd8_d07_chip_r1_eomes | GSM3612595        | van der Veeken et al. |
| b6_cast_lcmv_cd8_d07_chip_r2_tbet  | GSM3612599        | van der Veeken et al. |

Reads were mapped to the *Mus musculus* genome (assembly mm10) using Bowtie v1.0.0 with default parameters except for “-m 1 --strata --best”.

*ATAC-seq datasets.* The following published datasets were downloaded from GEO or SRA in SRA format and converted to FASTQ format using the fastq-dump program in the sratoolkit (version 2.1.9).

| GEO Identifier | Sample name         | Condition |
|----------------|---------------------|-----------|
| SRR3152814     | 9_ATAC_BM_iNK_rpt1  | iNK       |
| SRR3152815     | 10_ATAC_BM_iNK_rpt2 | iNK       |
| SRR3152822     | 17_ATAC_BM_NKp_rpt1 | NKp       |
| SRR3152823     | 18_ATAC_BM_NKp_rpt2 | NKp       |
| SRR3152848     | 43_ATAC_Sp_NK_rpt1  | Sp_NK     |
| SRR3152849     | 44_ATAC_Sp_NK_rpt2  | Sp_NK     |

These data were analyzed using the Encode ATAC-seq pipeline v1.5.1. Briefly, bowtie v2.3.4.3 was used to align reads to the reference mouse genome mm10/GRCh38 and MACS2 v2.2.4 was used to call OCRs. Footprinting analysis of ATAC-seq data was performed using the suite of tools TOBIAS<sup>51</sup>. Briefly, TOBIAS ATACorrect corrects Tn5 insertion bias, TOBIAS ScoreBigwig calculates footprint scores within regulatory regions, TOBIAS BINDetect estimates bound/unbound transcription factor binding sites. Known motifs were from the JASPAR CORE (2020) for vertebrate non-redundant database.
